# Supplementary material for: Early diagnosis of Alzheimer’s disease from elevated olfactory mucosal miR-206 level
Source: PubMed Central journal article supplement (PMC4740889; doi:10.1038/srep20364), 2016-02-04
Supplement: srep20364-s1.pdf [file srep20364-s1.pdf]

## Supplementary Information

### Early diagnosis of Alzheimer's disease from elevated olfactory mucosal miR-206 level

**Authors:** Jangsup Moon, Soon-Tae Lee, Il Gyu Kong, Jung-Ick Byun, Jun-Sang Sunwoo, Jung-Won Shin, Ji-Young Shim, Ji-Hyun Park, Daejong Jeon, Keun-Hwa Jung, Ki-Young Jung, Dong-Young Kim, Sang Kun Lee, Manho Kim, Kon Chu

**Supplementary Table S1. The clinical features and detailed test results for the individual patients**

| Group   | Sex | Age | BDI-2 | MMSE | CDR | ADAS-Cog | KVSS | $\Delta C_T$ Mean | $2^{-\Delta C_T}$ | $2^{-\Delta C_T} \times 10^4$ | Complication             |
|---------|-----|-----|-------|------|-----|----------|------|-------------------|-------------------|-------------------------------|--------------------------|
| CDR 0   | F   | 74  | 13    | 28   | 0   | 9.1      | 21.5 | 10.59588          | 0.00065           | 6.46132                       | none                     |
| CDR 0   | M   | 68  | 1     | 29   | 0   | 14.3     | 18   | 10.92919          | 0.00051           | 5.12844                       | none                     |
| CDR 0   | F   | 57  | 7     | 30   | 0   | 4.3      | 26.5 | 12.75072          | 0.00015           | 1.45094                       | none                     |
| CDR 0   | M   | 69  | 2     | 23   | 0   | 13.6     | 25.5 | 12.70721          | 0.00015           | 1.49537                       | none                     |
| CDR 0   | M   | 50  | 12    | 30   | 0   | 5.8      | 25   | 11.16770          | 0.00043           | 4.34699                       | mild headache            |
| CDR 0   | F   | 53  | 2     | 29   | 0   | 5.3      | 23   | 10.90108          | 0.00052           | 5.22934                       | none                     |
| CDR 0   | M   | 56  | 0     | 29   | 0   | 11.5     | 26.5 | 12.36474          | 0.00019           | 1.89602                       | sustained nasal bleeding |
| CDR 0   | F   | 63  | 0     | 29   | 0   | 8.1      | 29   | 13.76389          | 0.00007           | 0.71888                       | none                     |
| CDR 0   | F   | 68  | 10    | 28   | 0   | 3.3      | 23   | 12.68512          | 0.00015           | 1.51845                       | none                     |
| CDR 0.5 | M   | 72  | 12    | 27   | 0.5 | 17       | 20   | 9.64579           | 0.00125           | 12.48328                      | none                     |
| CDR 0.5 | F   | 77  | 15    | 28   | 0.5 | 11.2     | 20.5 | 11.13268          | 0.00045           | 4.45377                       | none                     |
| CDR 0.5 | M   | 59  | 12    | 27   | 0.5 | 16.8     | 31   | 10.15675          | 0.00088           | 8.76019                       | none                     |
| CDR 0.5 | F   | 68  | 17    | 26   | 0.5 | 8.5      | 26   | 11.25944          | 0.00041           | 4.07915                       | none                     |
| CDR 0.5 | F   | 79  | 6     | 26   | 0.5 | 15.3     | 14   | 10.42393          | 0.00073           | 7.27922                       | none                     |
| CDR 0.5 | F   | 60  | 17    | 27   | 0.5 | 9.5      | 27   | 11.31338          | 0.00039           | 3.92946                       | none                     |
| CDR 0.5 | M   | 68  | 4     | 27   | 0.5 | 10.1     | 24.5 | 8.66572           | 0.00246           | 24.62390                      | sustained nasal bleeding |
| CDR 0.5 | F   | 60  | 4     | 26   | 0.5 | 15.1     | 28.5 | 7.31626           | 0.00627           | 62.74625                      | none                     |
| CDR 0.5 | F   | 68  | 19    | 25   | 0.5 | 13.5     | 26.5 | 7.36423           | 0.00607           | 60.69403                      | none                     |
| CDR 0.5 | F   | 78  | 12    | 29   | 0.5 | 8.1      | 26   | 8.17483           | 0.00346           | 34.60431                      | none                     |
| CDR 0.5 | F   | 63  | 11    | 27   | 0.5 | 8.8      | 30.5 | 7.81144           | 0.00445           | 44.51657                      | none                     |
| CDR 0.5 | M   | 56  | 11    | 29   | 0.5 | 6.6      | 15.5 | 7.89069           | 0.00421           | 42.13731                      | none                     |
| CDR 0.5 | F   | 66  | 4     | 24   | 0.5 | 5.5      | 17   | 10.21946          | 0.00084           | 8.38757                       | none                     |

|            |   |    |    |    |     |      |      |          |         |           |                      |
|------------|---|----|----|----|-----|------|------|----------|---------|-----------|----------------------|
| CDR 1      | M | 75 | 3  | 26 | 1   | 12.5 | 24.5 | 6.36321  | 0.01215 | 121.47419 | none                 |
| CDR 1      | M | 60 | 19 | 21 | 1   | 18.1 | 18   | 5.55832  | 0.02122 | 212.21689 | none                 |
| CDR 1      | F | 71 | 19 | 22 | 1   | 18.8 | 26   | 5.93141  | 0.01639 | 163.85759 | none                 |
| CDR 1      | F | 57 | 10 | 26 | 1   | 9.6  | 24   | 6.64777  | 0.00997 | 99.72909  | none                 |
| CDR 1      | F | 69 | 18 | 22 | 1   | 12   | 21   | 5.33047  | 0.02485 | 248.52375 | none                 |
| CDR 1      | M | 68 | 7  | 26 | 1   | 17.8 | N/A  | 5.90438  | 0.01670 | 166.95730 | none                 |
| CDR 1      | F | 80 | 3  | 21 | 1   | 36.5 | 18.5 | 7.92495  | 0.00411 | 41.14842  | none                 |
| CDR 1      | F | 80 | 7  | 24 | 1   | 14   | 26   | 6.38595  | 0.01196 | 119.57435 | none                 |
| CDR 1      | M | 66 | 6  | 25 | 1   | 6    | N/A  | 6.06499  | 0.01494 | 149.36778 | none                 |
| CDR 1      | M | 68 | 9  | 26 | 1   | 16.6 | 22.5 | 7.50821  | 0.00549 | 54.92910  | none                 |
| CDR 1      | M | 74 | 1  | 23 | 1   | 14.3 | N/A  | 7.47595  | 0.00562 | 56.17148  | none                 |
| Depression | F | 64 | 30 | 28 | 0.5 | 8.3  | 24.5 | 14.75719 | 0.00004 | 0.36111   | none                 |
| Depression | M | 56 | 44 | 22 | 1   | 34.3 | 21.5 | 13.56191 | 0.00008 | 0.82691   | none                 |
| Depression | F | 59 | 29 | 17 | 1   | 20.3 | 20   | 11.05978 | 0.00047 | 4.68461   | none                 |
| Depression | F | 64 | 33 | 26 | 1   | 10.6 | 6    | 11.75768 | 0.00029 | 2.88792   | none                 |
| Depression | F | 62 | 28 | 28 | 0   | 8.5  | 29   | 10.51300 | 0.00068 | 6.84340   | none                 |
| Depression | F | 61 | 25 | 24 | 1   | 13.8 | 27.5 | 12.94812 | 0.00013 | 1.26540   | watery<br>rhinorrhea |
| Depression | F | 66 | 24 | 27 | 0.5 | 13.1 | 20   | 9.64357  | 0.00125 | 12.50250  | none                 |
| Depression | M | 59 | 22 | 29 | 0   | 8    | 26.5 | 13.04149 | 0.00012 | 1.18610   | none                 |

**Supplementary Table S2. The relative miR-206 levels in each age group**

| <b>Relative miR-206 level†</b> | <b>CDR 0</b> | <b>CDR 0.5</b>        | <b>CDR 1</b>             | <b>Depression</b>    | <b>P-value*</b> |
|--------------------------------|--------------|-----------------------|--------------------------|----------------------|-----------------|
| < 65 years old (n=19)          | 1            | 11.9±4.1 <sup>b</sup> | 57.1±20.6 <sup>a,d</sup> | 0.9±0.3 <sup>e</sup> | 0.011           |
| > 65 years old (n=22)          | 1            | 5.4±1.9               | 34.1±6.1 <sup>a,c</sup>  | 3.4                  | 0.001           |

Values are presented as the mean±standard error of the mean (SEM).

\* The Kruskal-Wallis test was performed.

† The relative miR-206 levels are divided by the mean value for the CDR 0 group.

<sup>a</sup> P < 0.01 vs. control

<sup>b</sup> P < 0.05 vs. control

<sup>c</sup> P < 0.001 vs. CDR 0.5

<sup>d</sup> P < 0.05 vs. CDR 0.5

<sup>e</sup> P < 0.001 vs. CDR 1

Abbreviations: CDR: clinical dementia rating

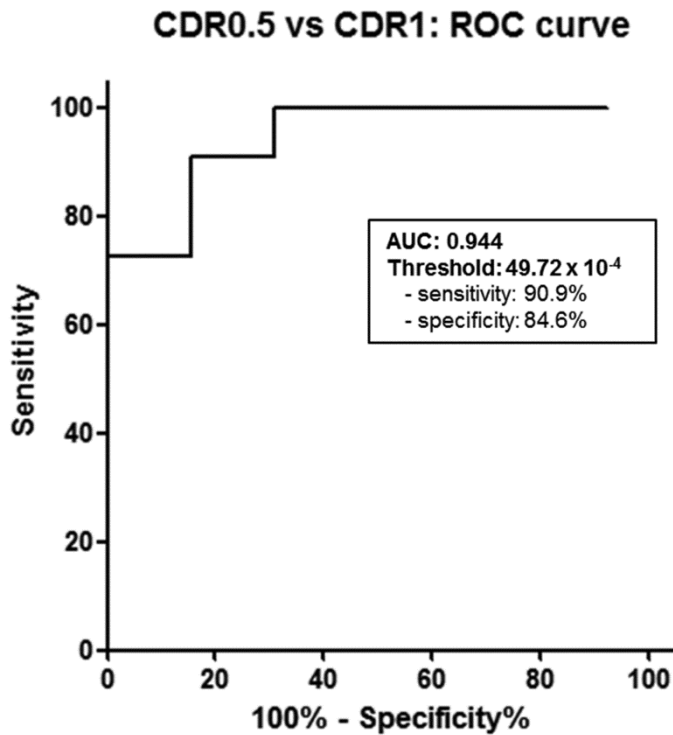

**Supplementary Figure S1. Receiver operating curve analysis of non-depressed cognitive impairment patients**

The non-depressed cognitive impairment patients were selected out, and receiver operating curve (ROC) analysis was performed. The area under the curve (AUC) is 0.944, and the sensitivity and specificity for diagnosing CDR 1 dementia are 90.9% and 84.6% at the optimal cutoff value.

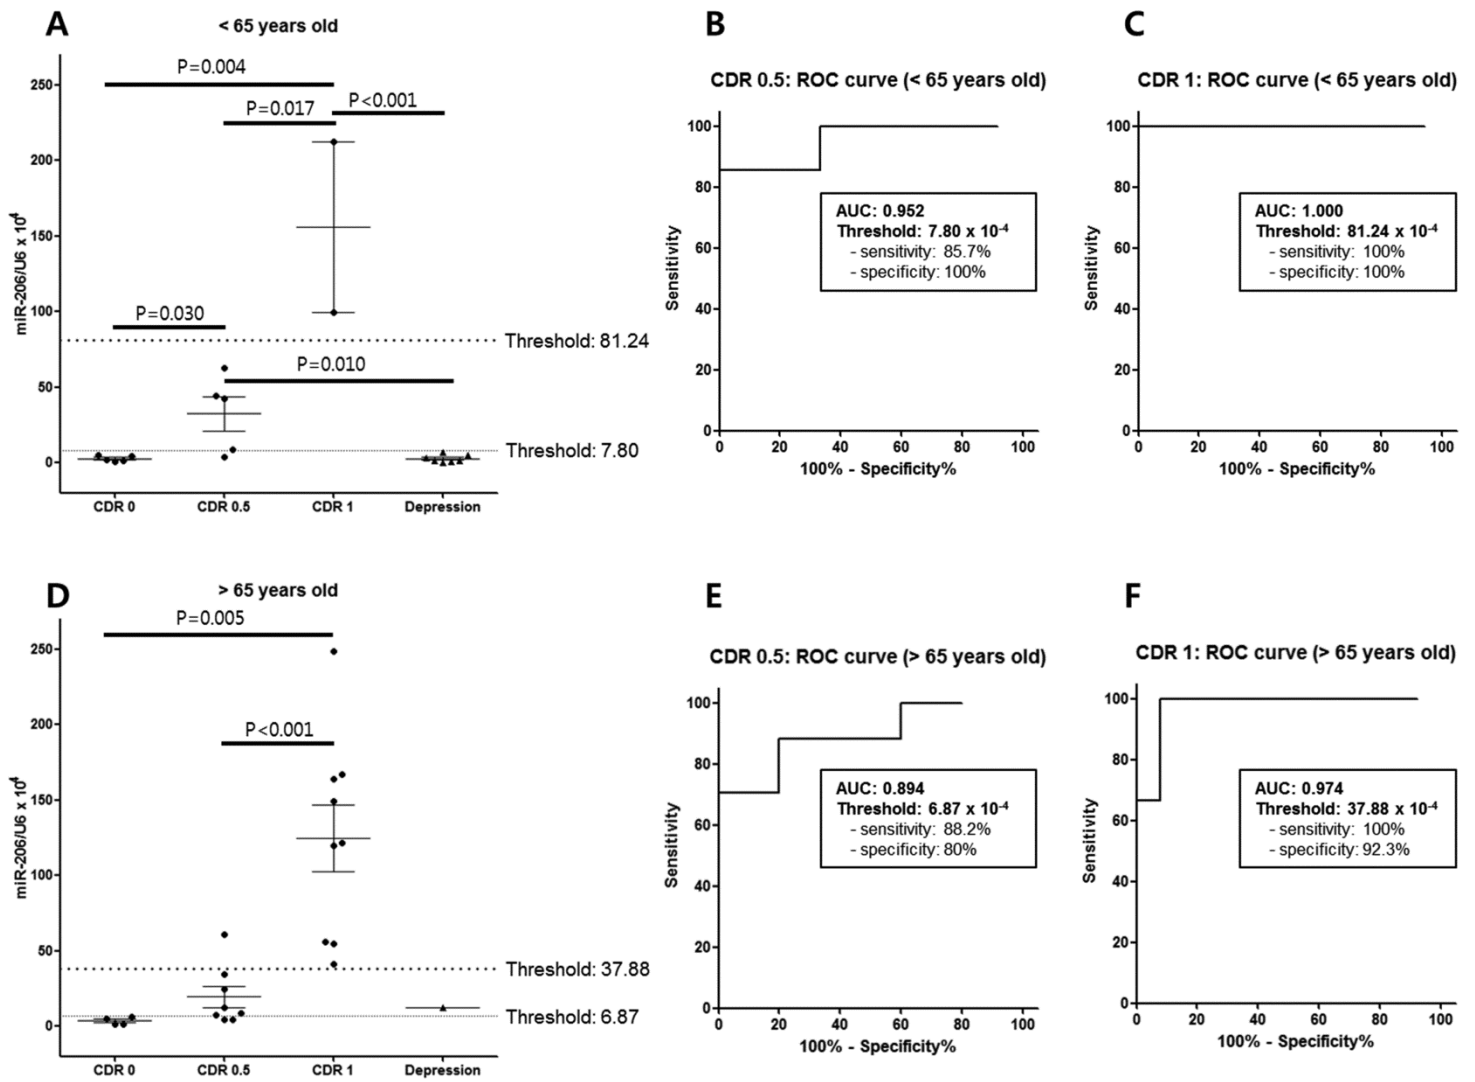

**Supplementary Figure S2. miRNA-206 real-time PCR results for olfactory epithelial samples from different age groups (< 65 years old versus > 65 years old)**

Panels A-C demonstrate the relative miRNA-206 level (normalized to the U6 level) and receiver operating curve (ROC) analysis results for the patients less than 65 years old. The areas under the curve (AUCs) are 0.952 and 1.000 for CDR 0.5 and CDR 1 dementia, respectively. Panels D-F demonstrate the relative miRNA-206 level and ROC analysis results for the patients older than age 65. The AUCs are 0.894 and 0.941 for CDR 0.5 and CDR 1 dementia, respectively.
